# Supplementary material
Source: PubMed Central journal article supplement (PMC6635957)

**Figure 2b**

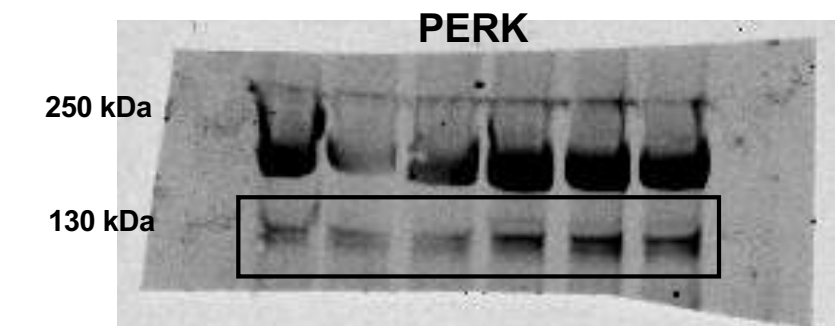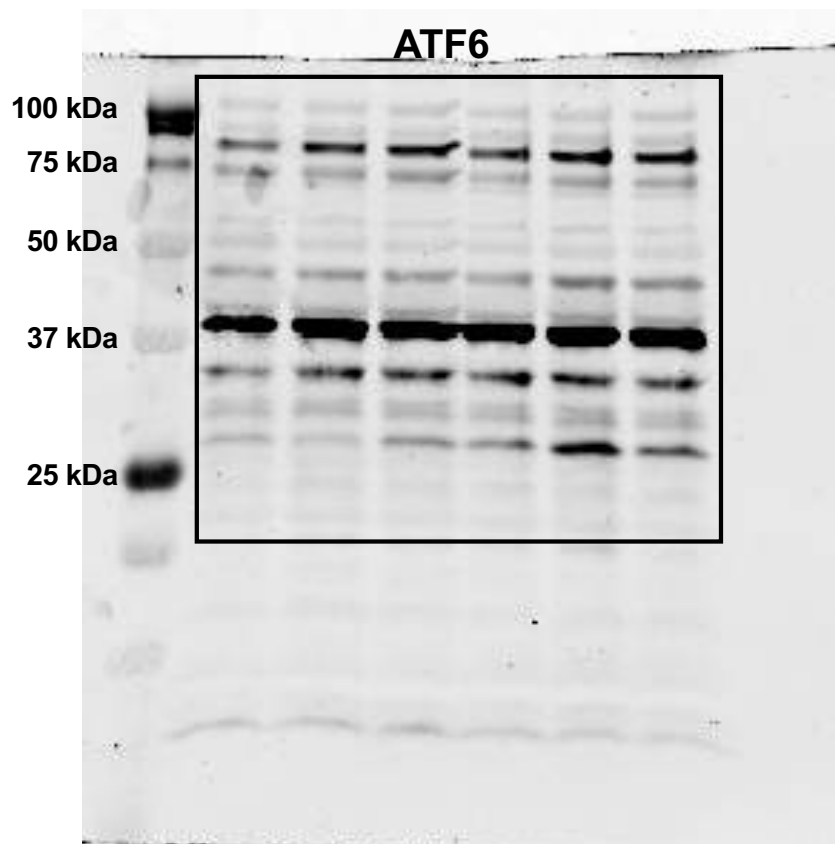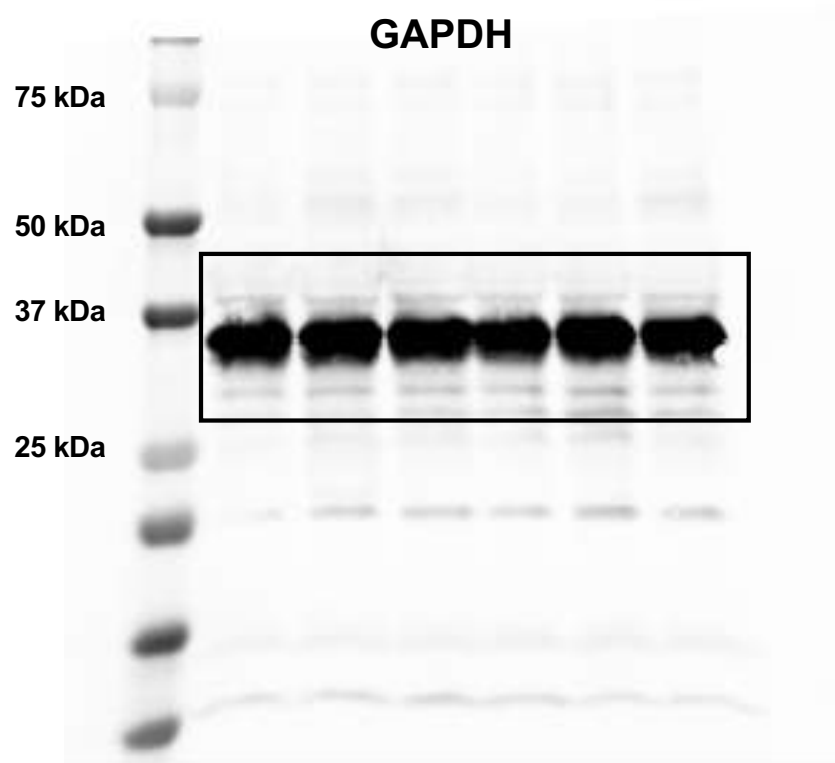

Figure 2c

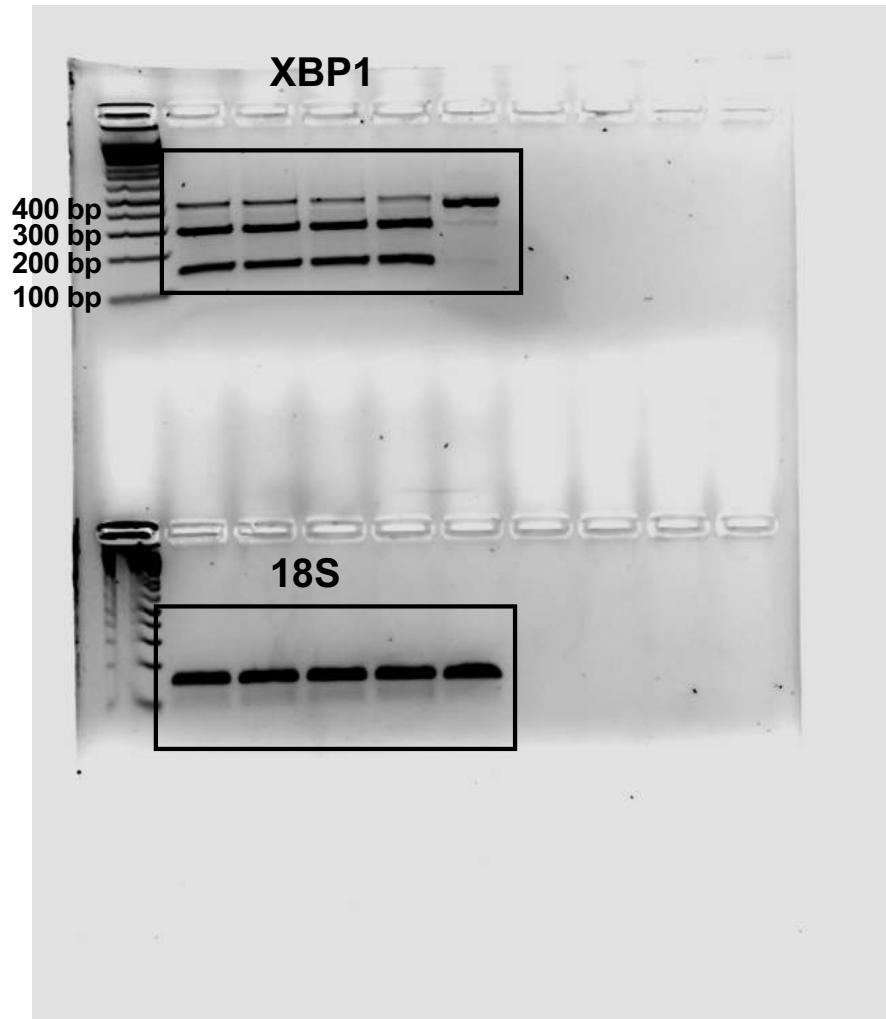

**Figure 2e**

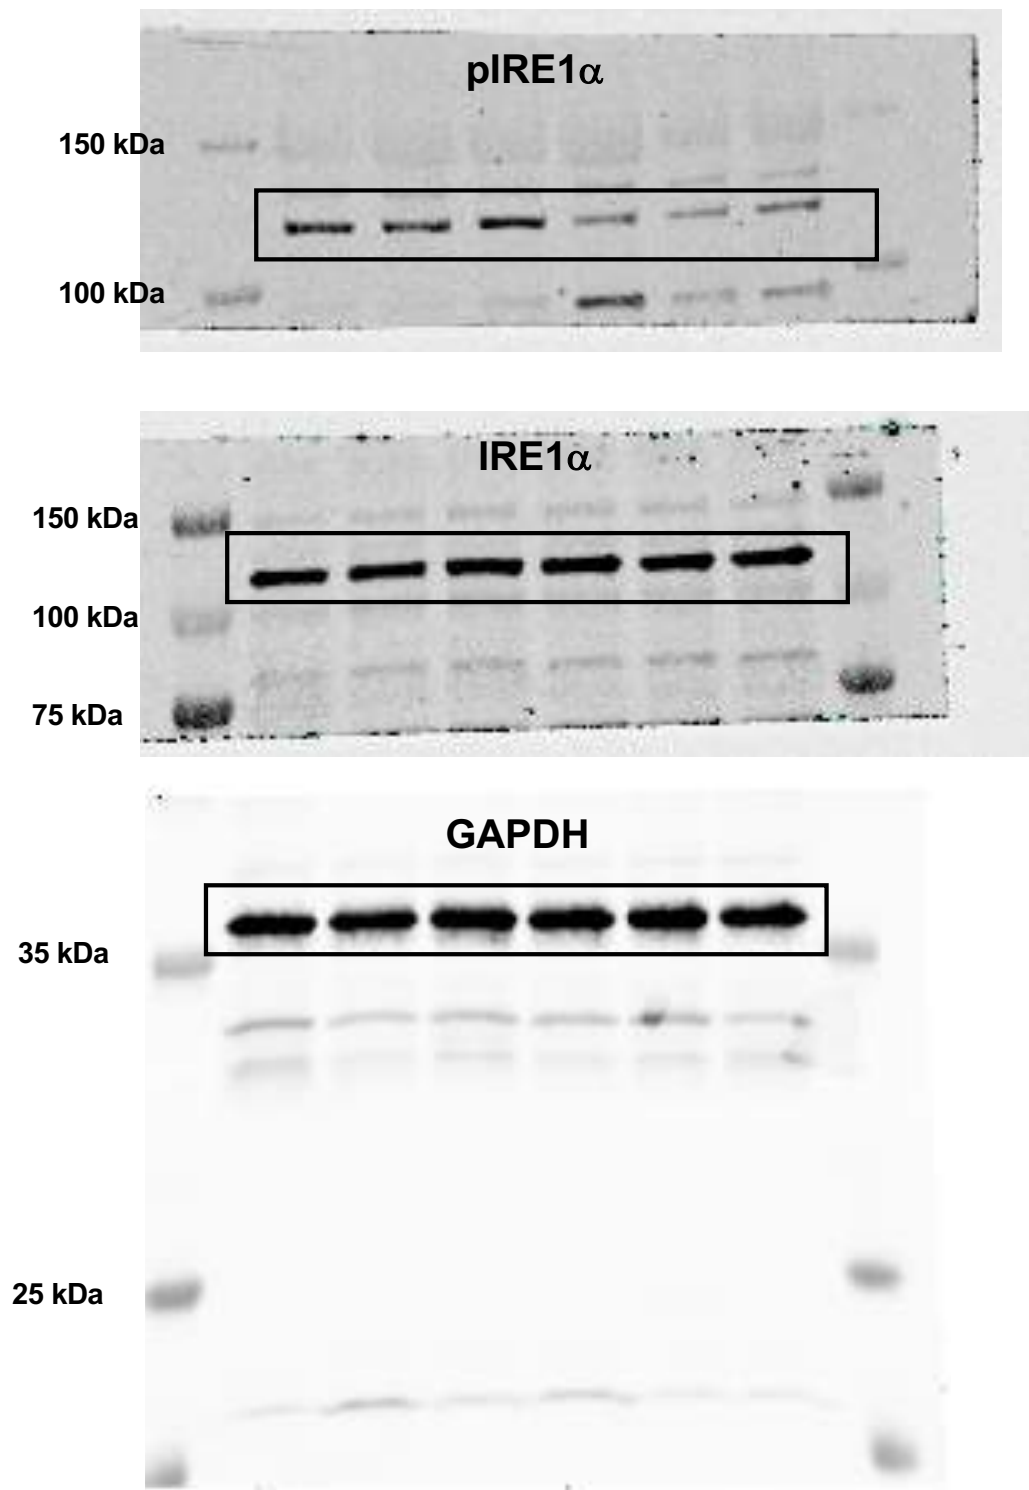

Figure 2h

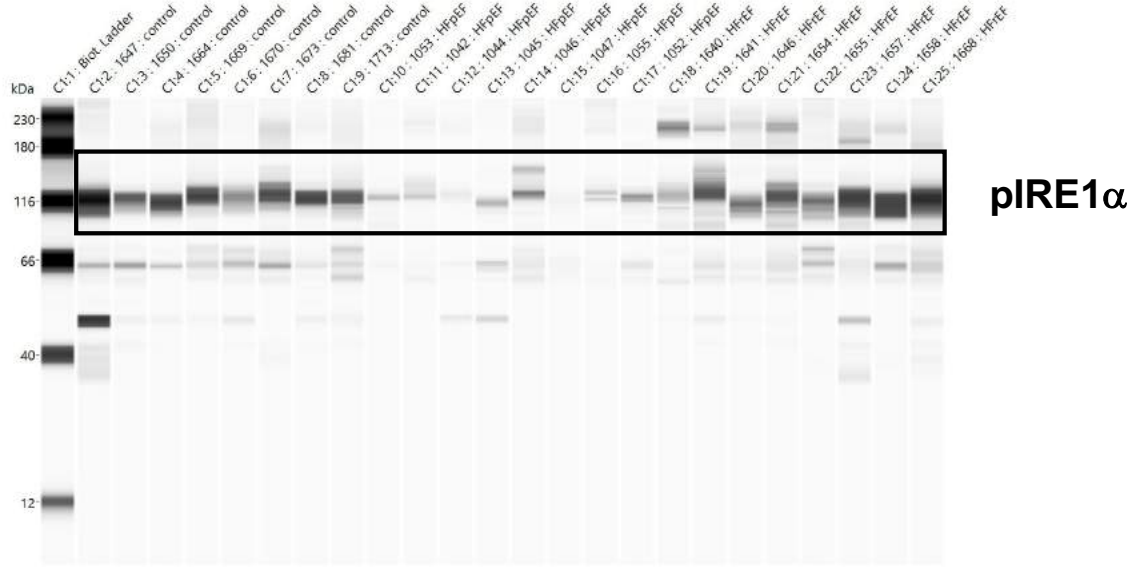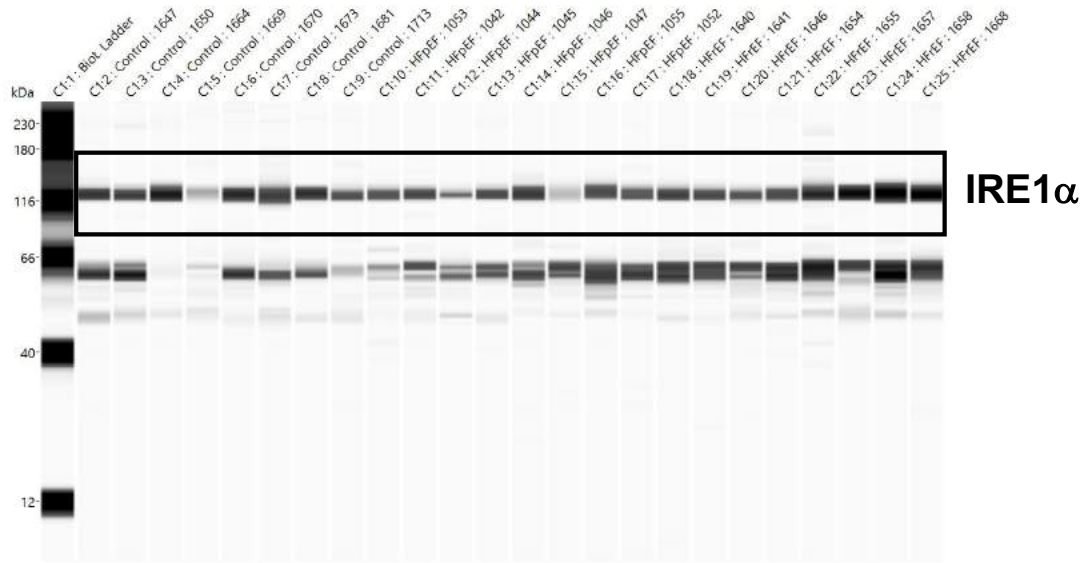

Figure 3e

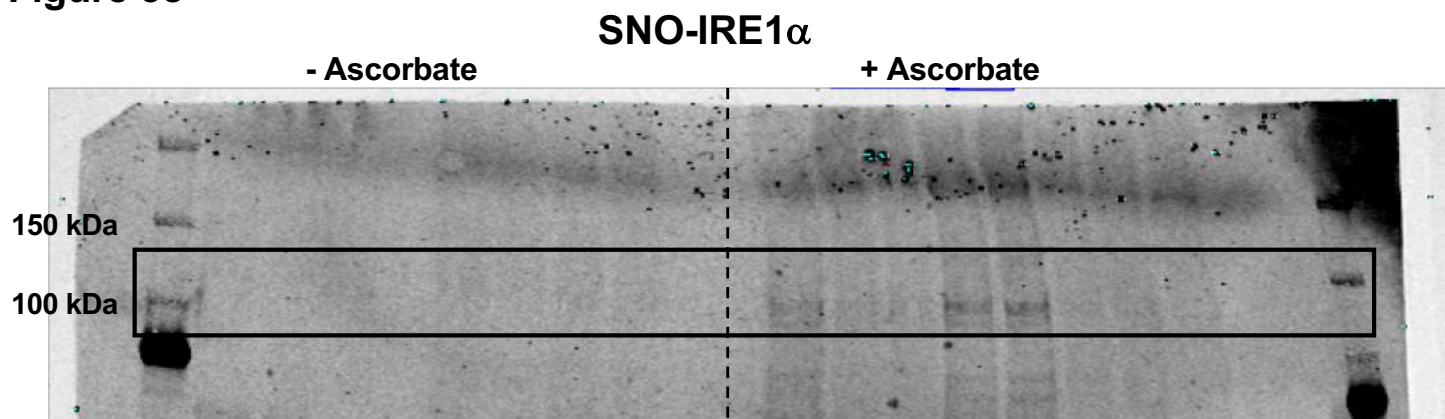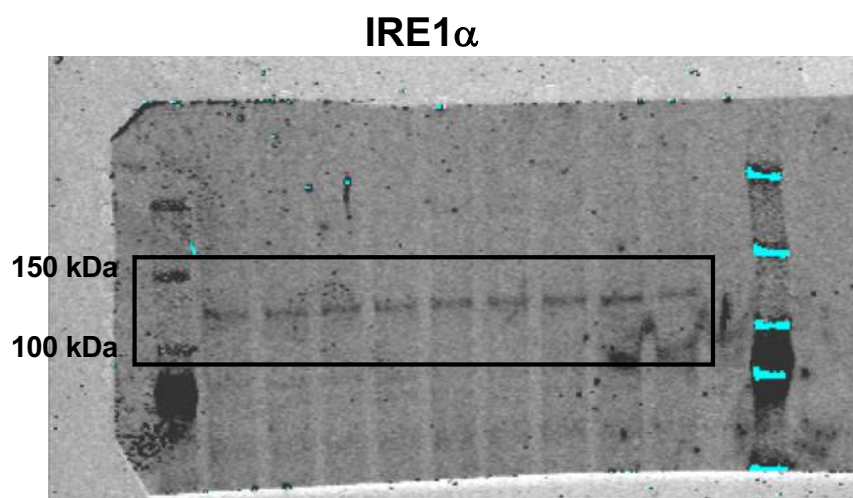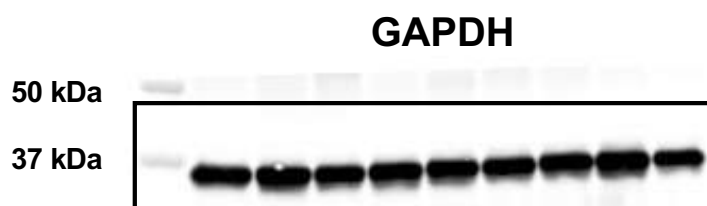

Figure 3g

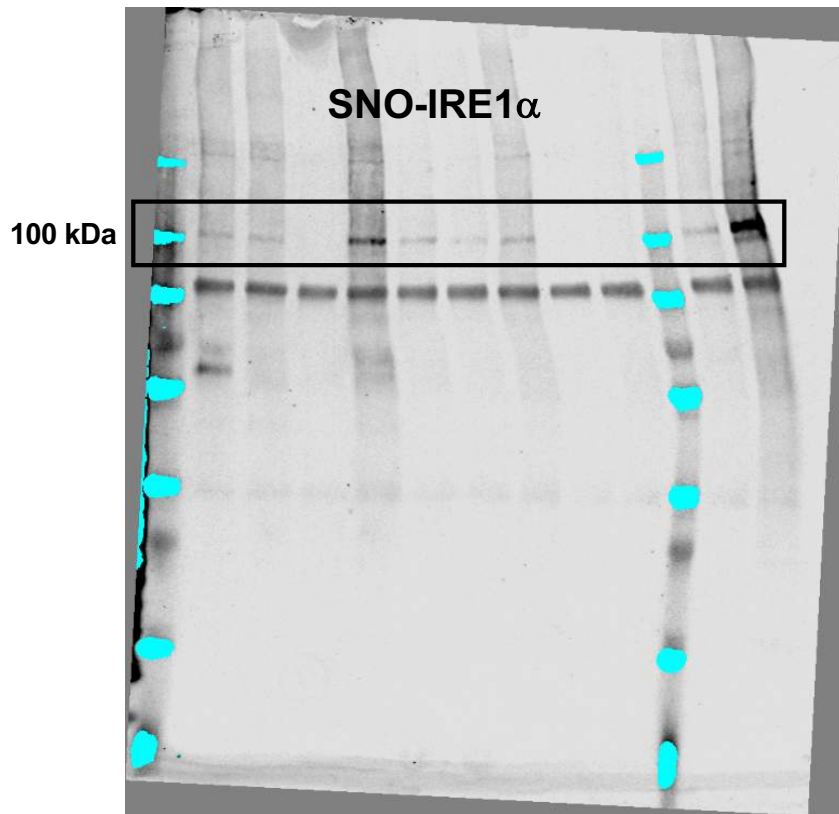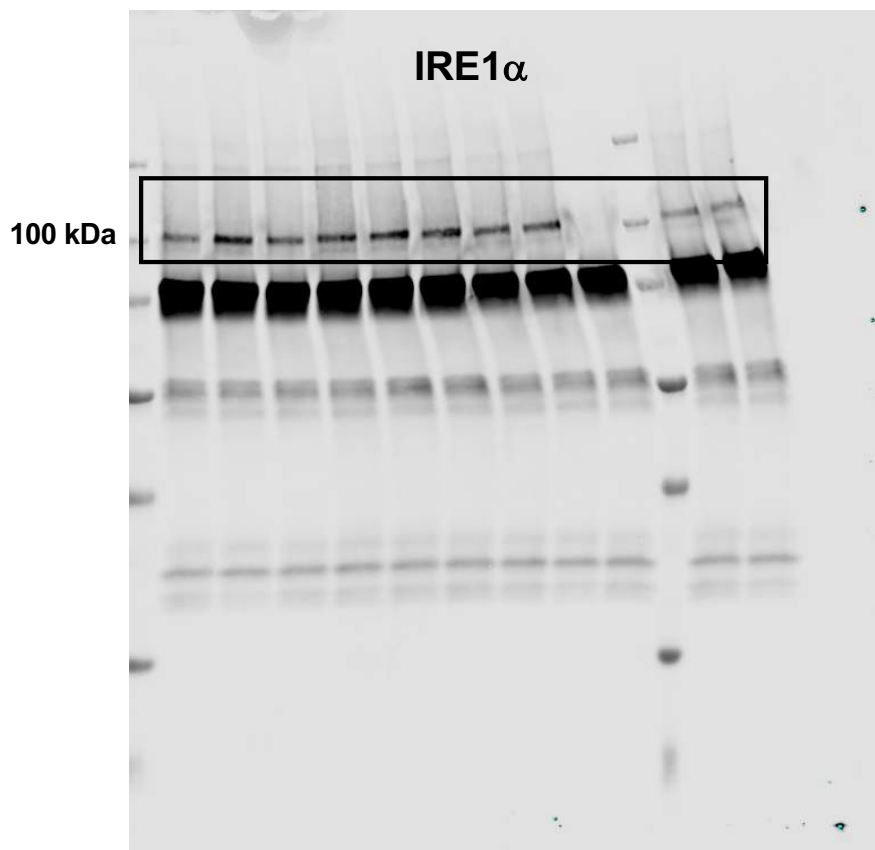

Figure 4e

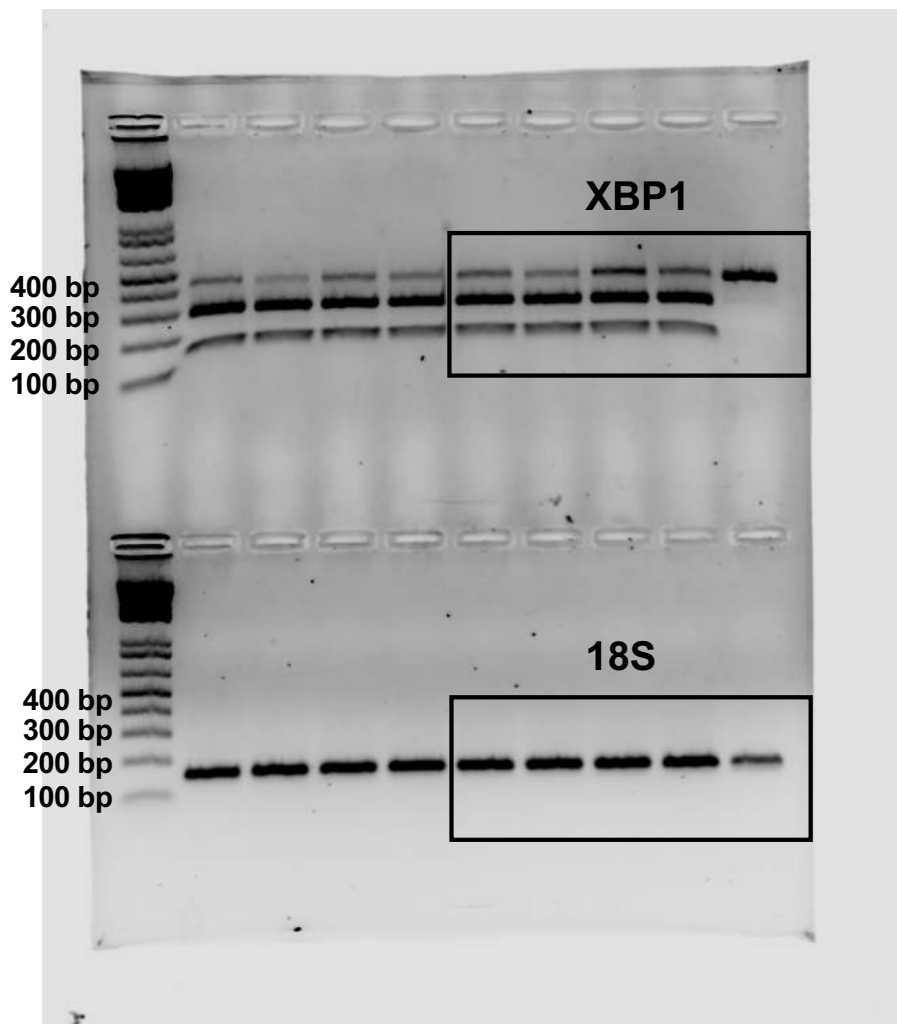

Figure 4g

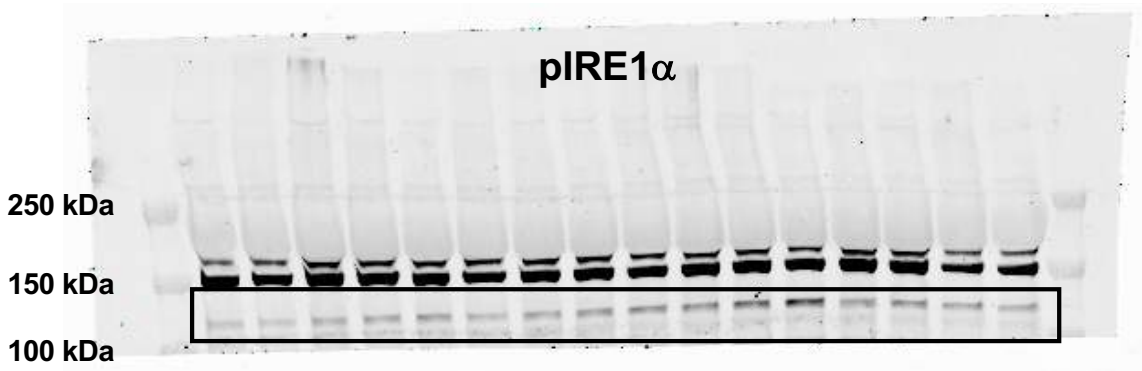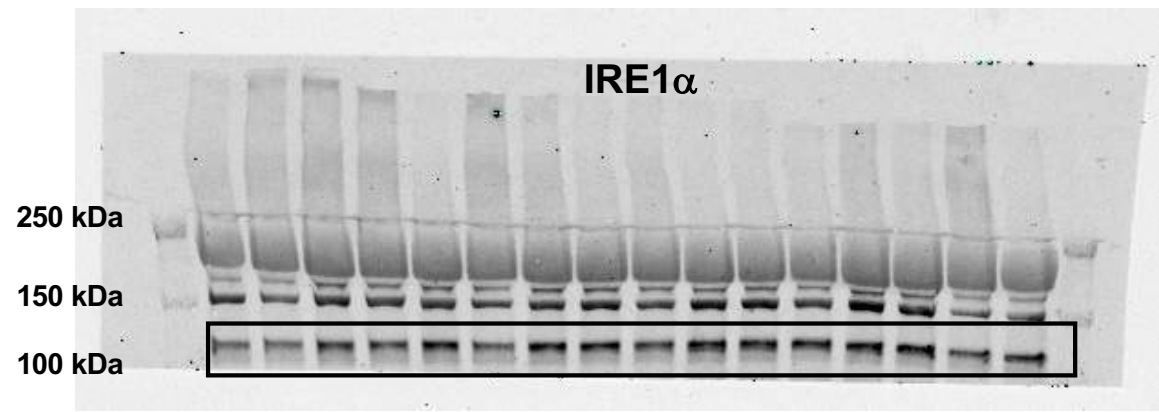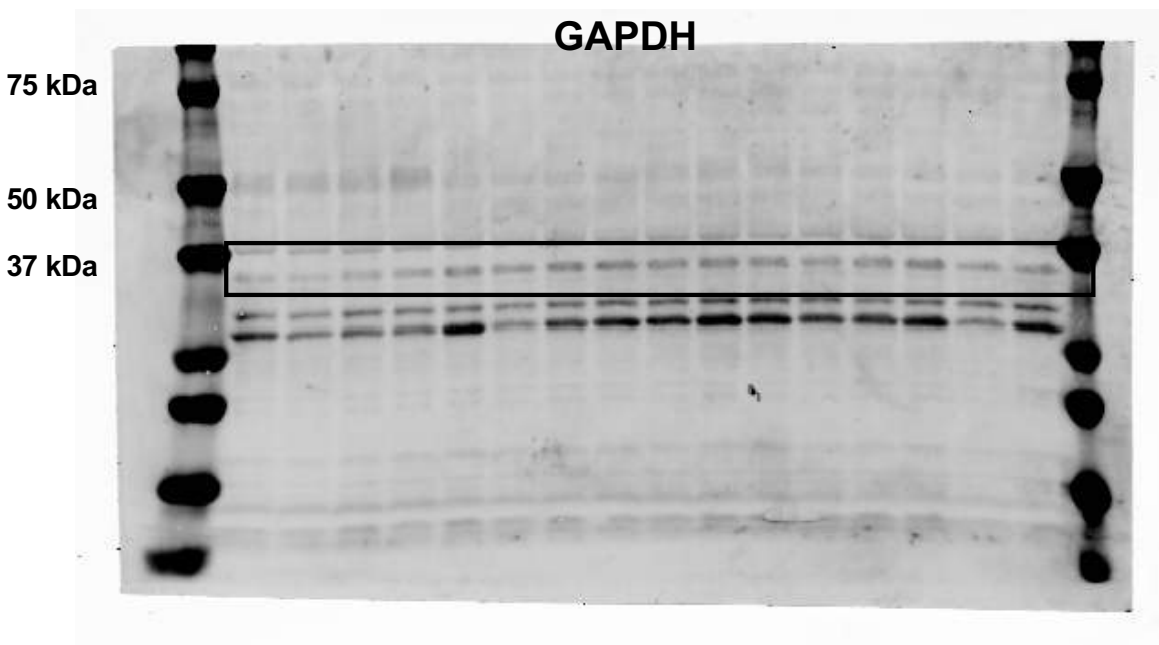



# Extended Data Figure 4m

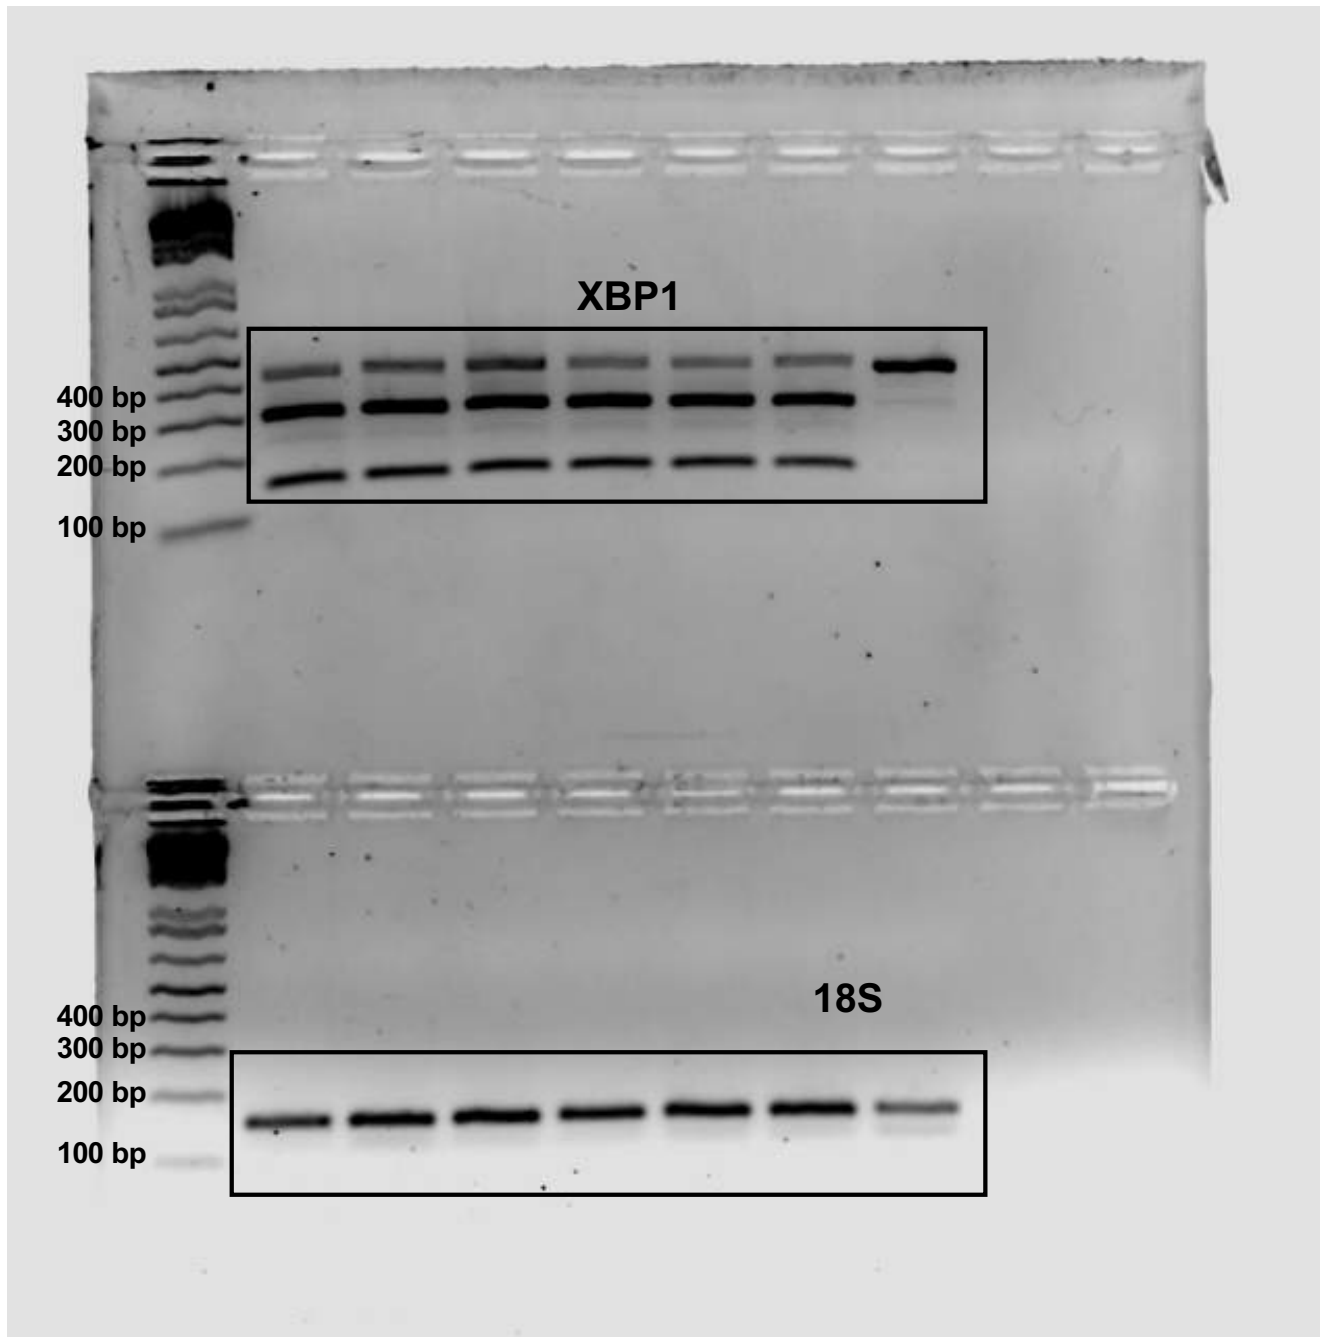

# Extended Data Figure 4o

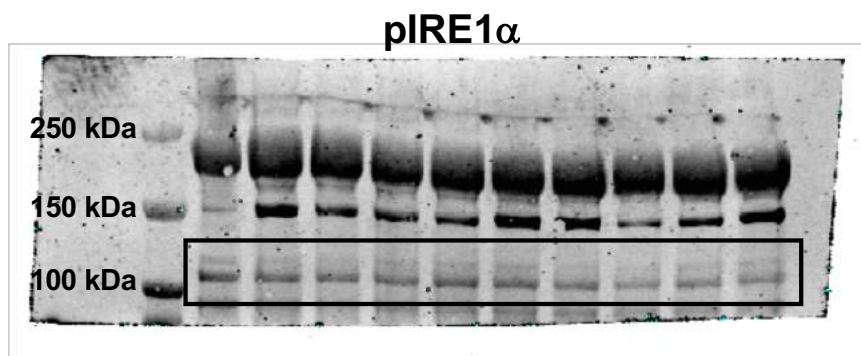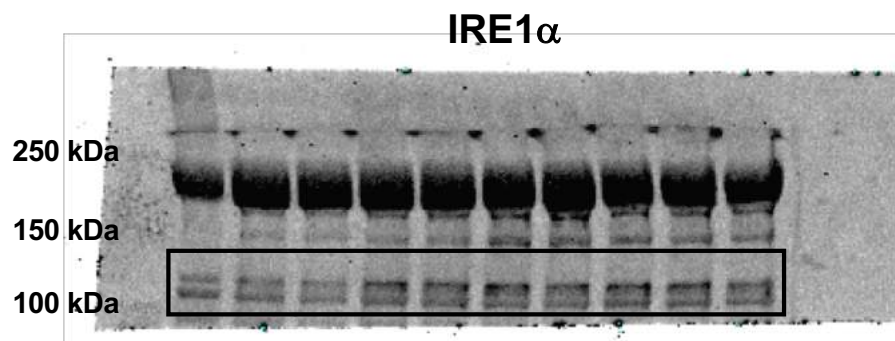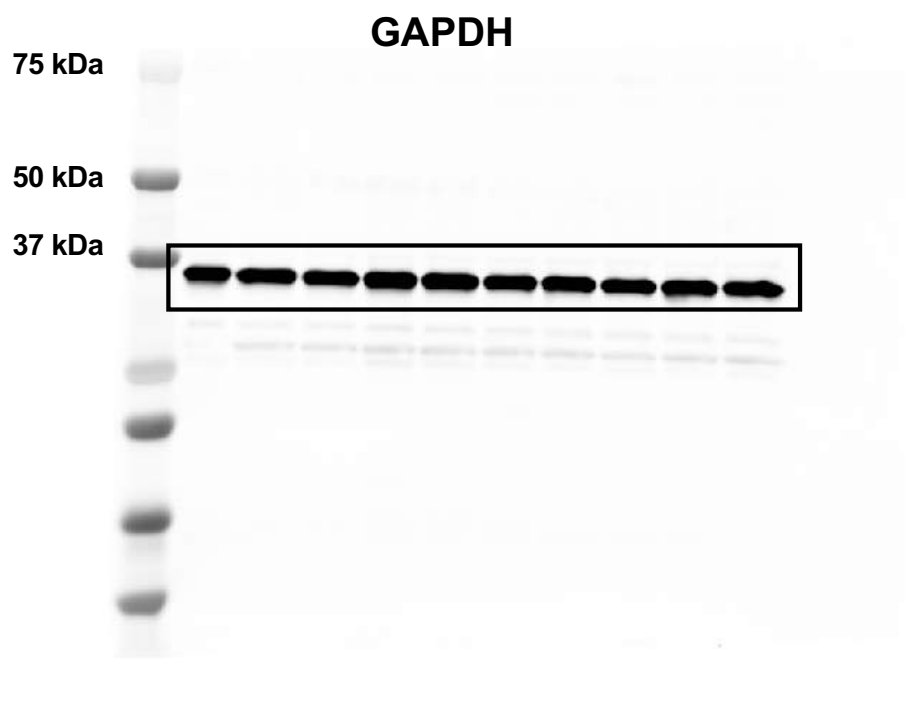

# Extended Data Figure 5h

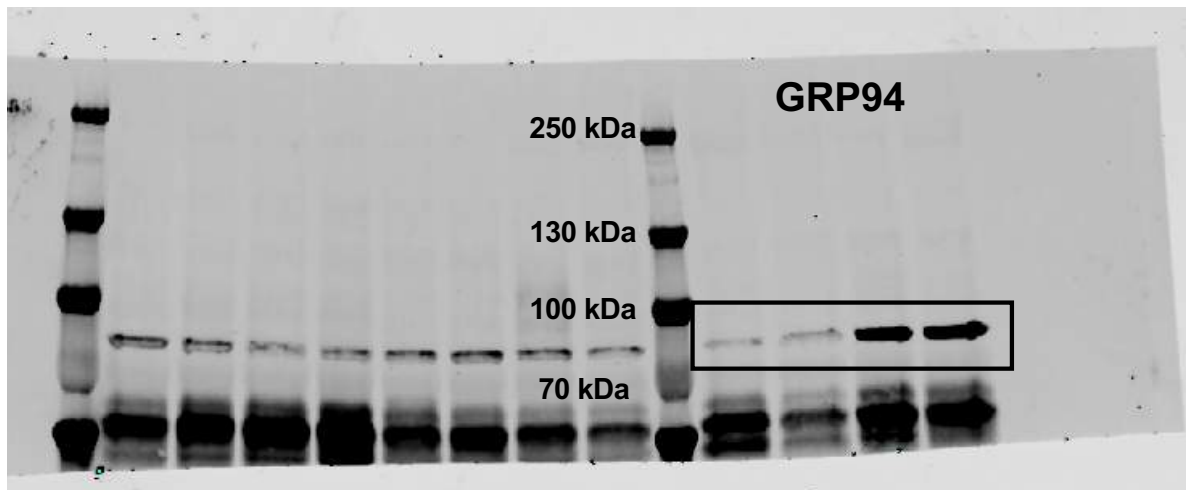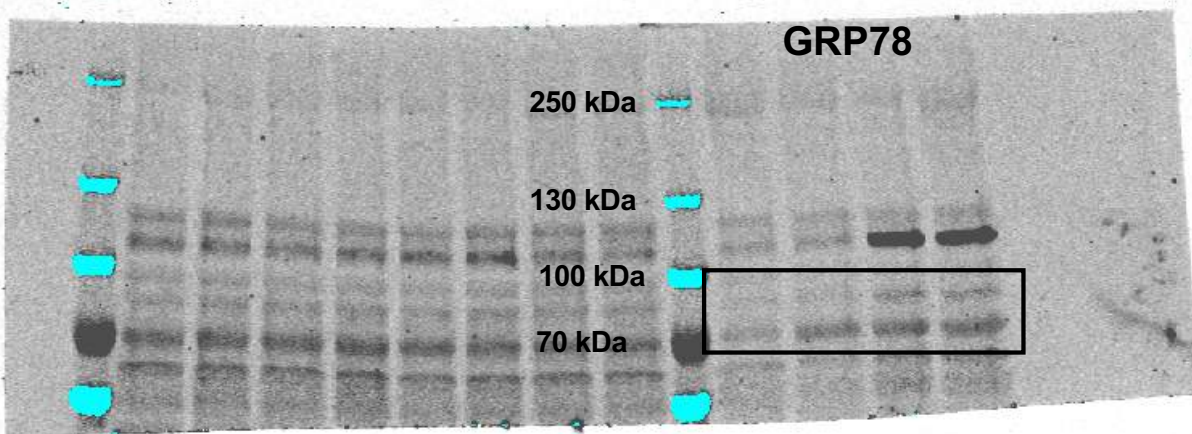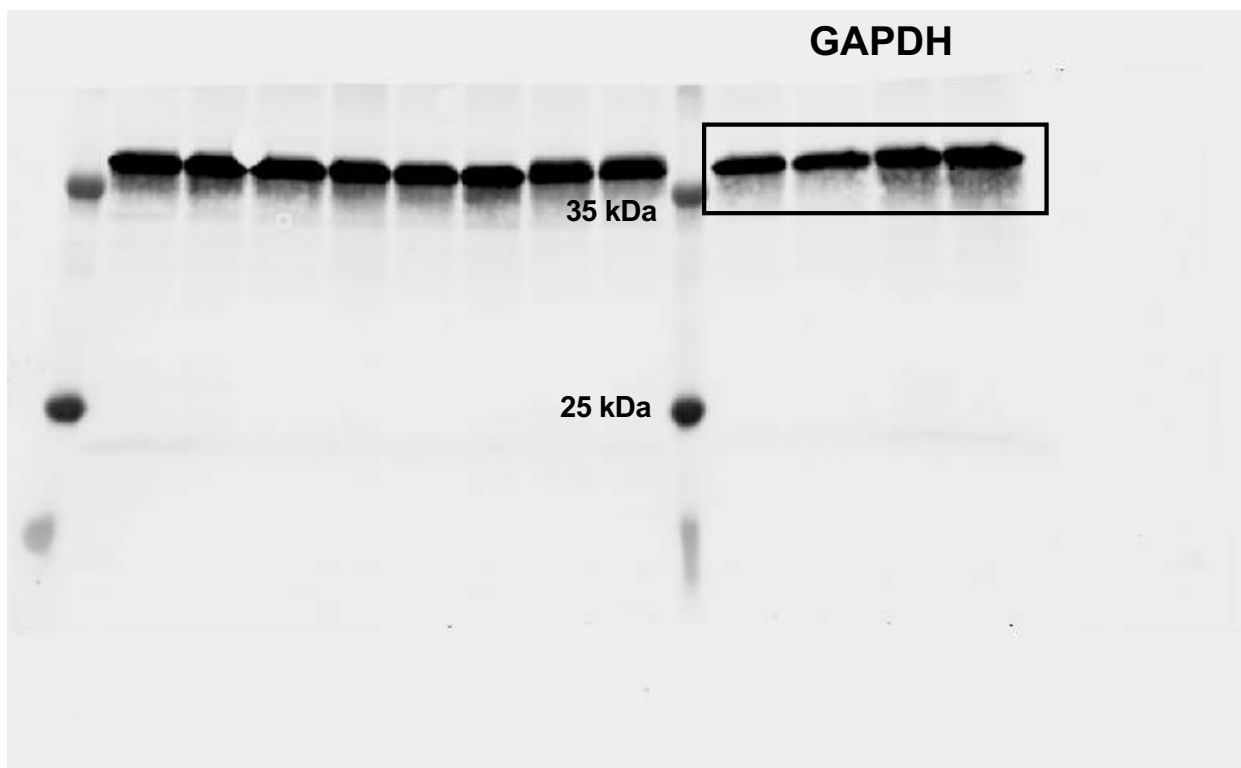

# Extended Data Figure 6h

## pIRE1 $\alpha$

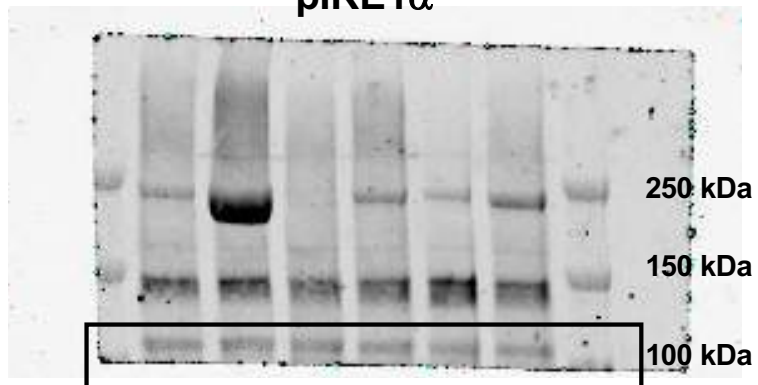

## IRE1 $\alpha$

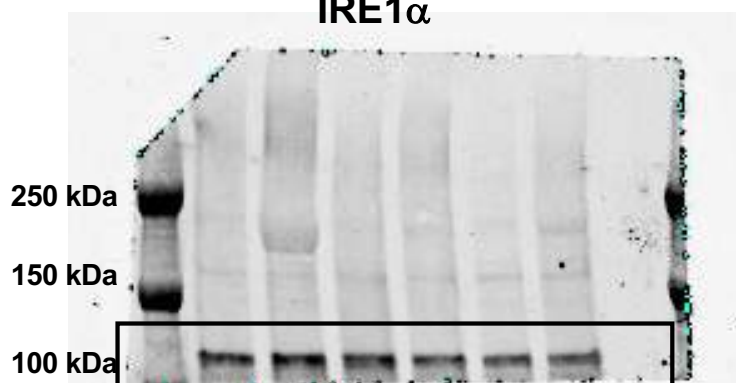

## GAPDH

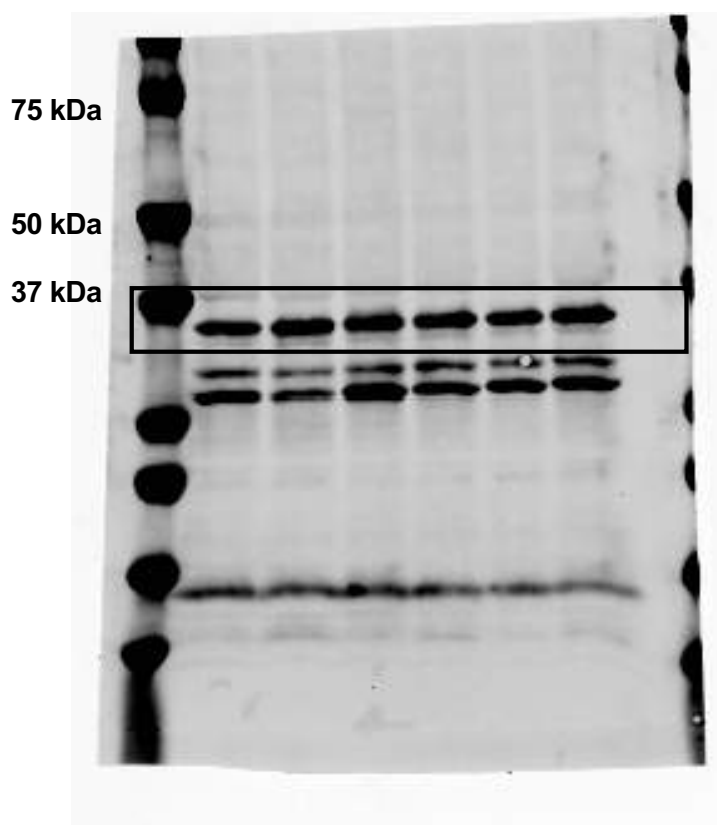

# Extended Data Figure 7c

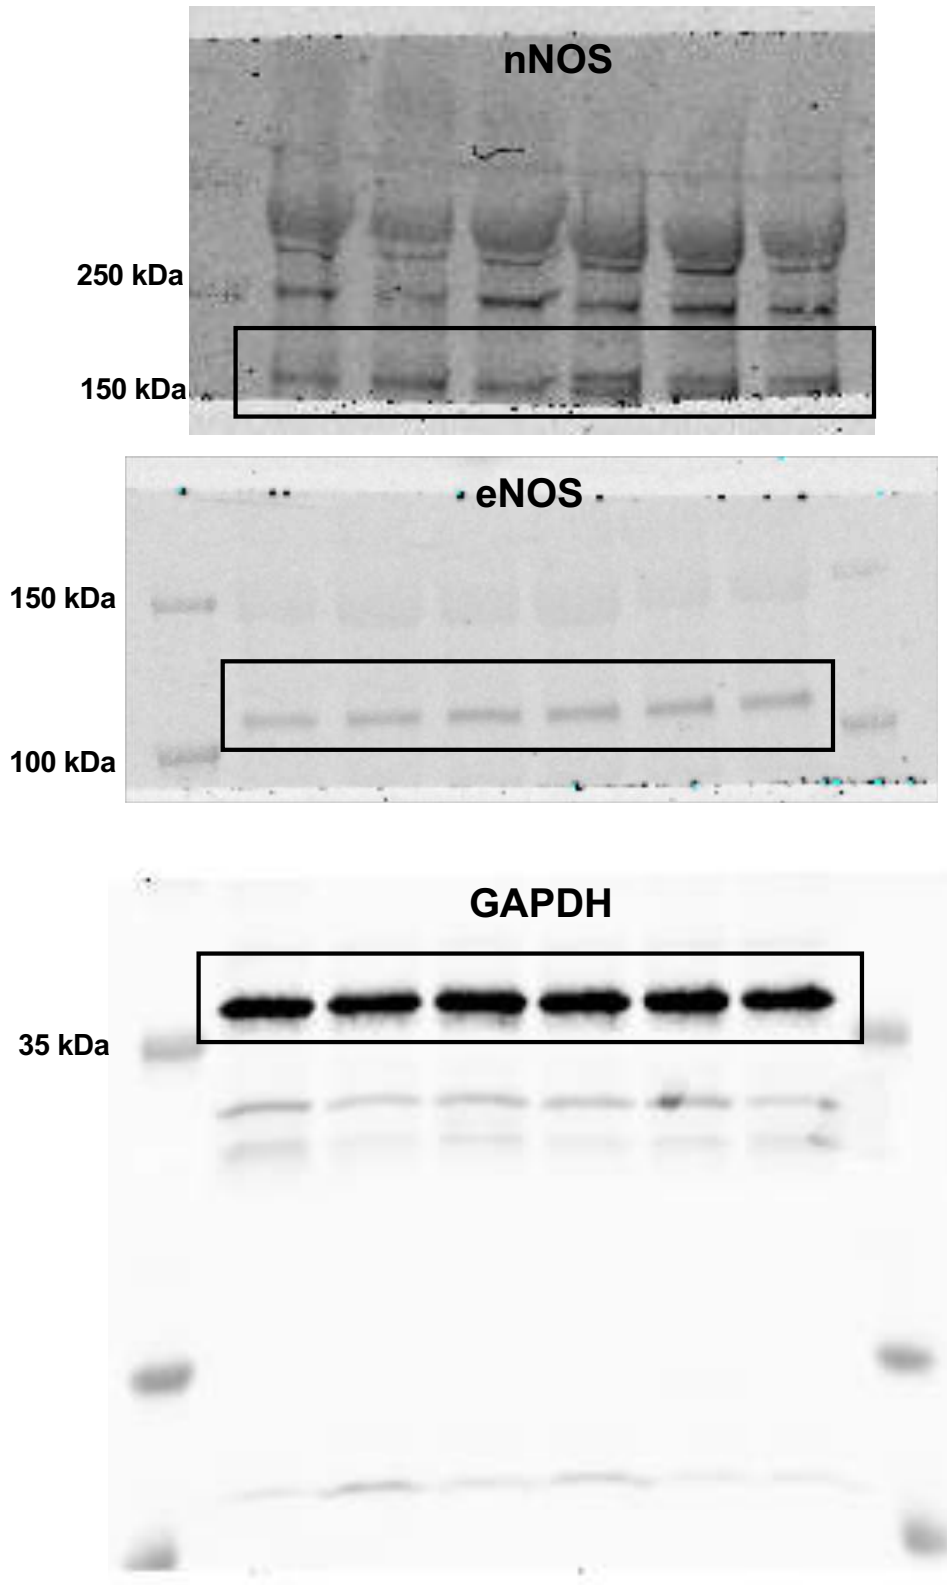

# Extended Data Figure 7e

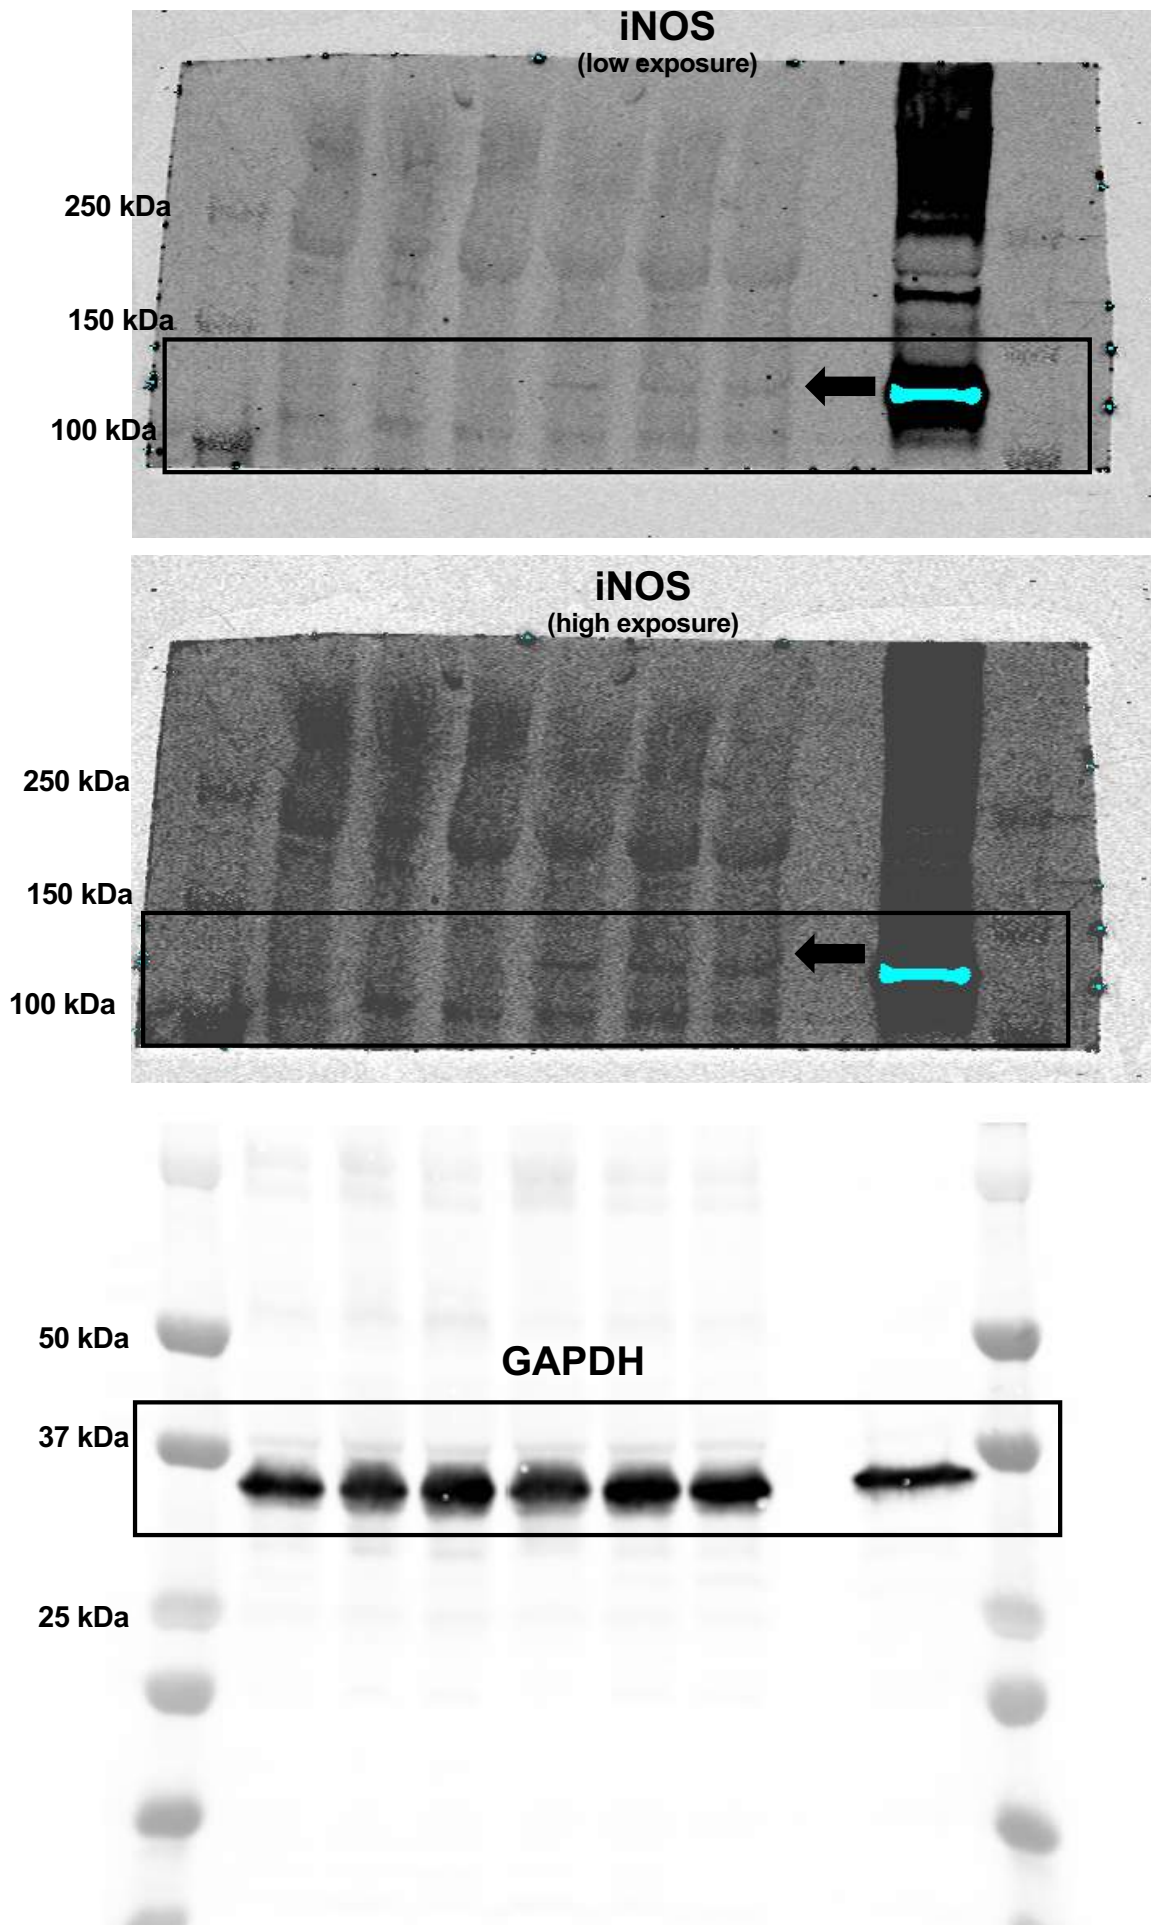



# Extended Data Figure 7f

## Cys-SNO

250 kDa  
150 kDa  
100 kDa  
75 kDa  
50 kDa

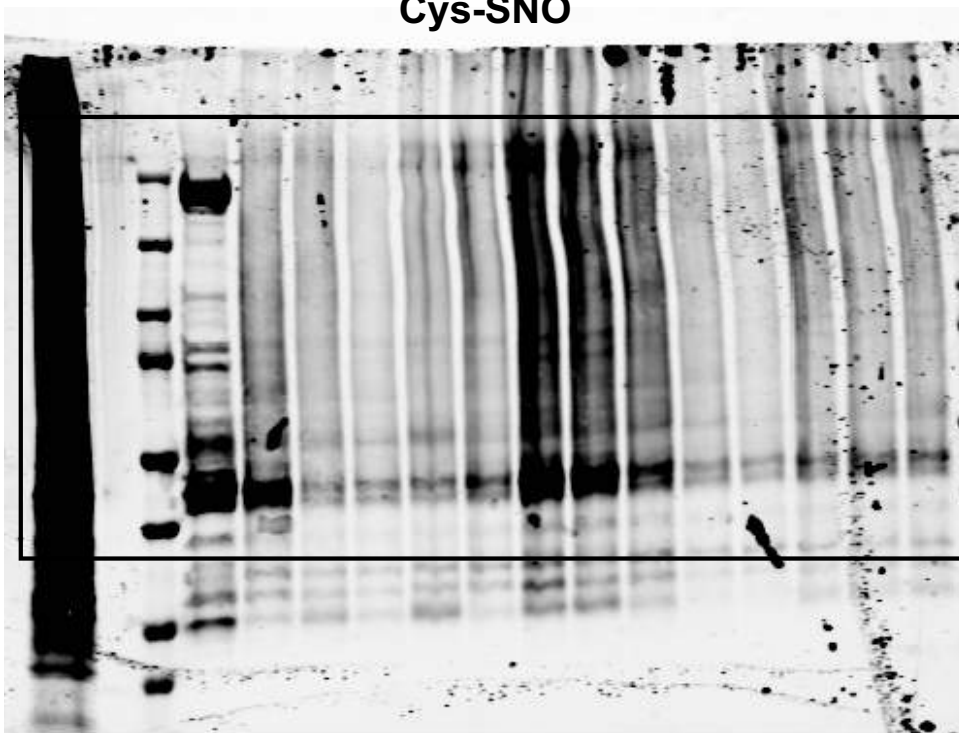

## GAPDH

250 kDa  
150 kDa  
100 kDa  
75 kDa  
50 kDa  
37 kDa

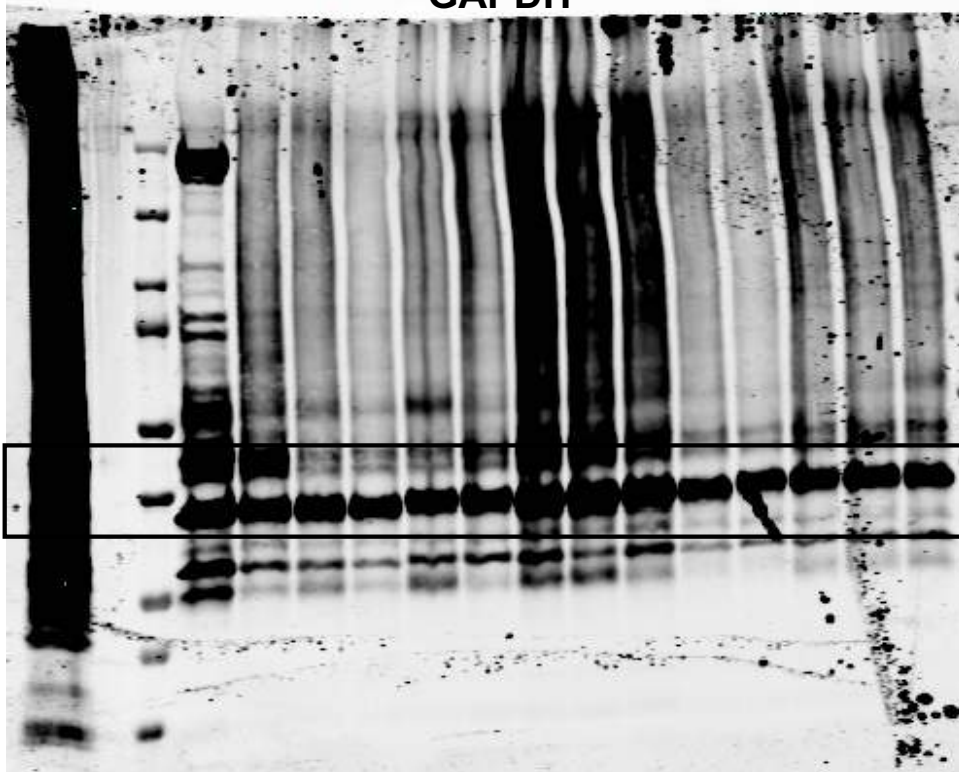

# Extended Data Figure 8a

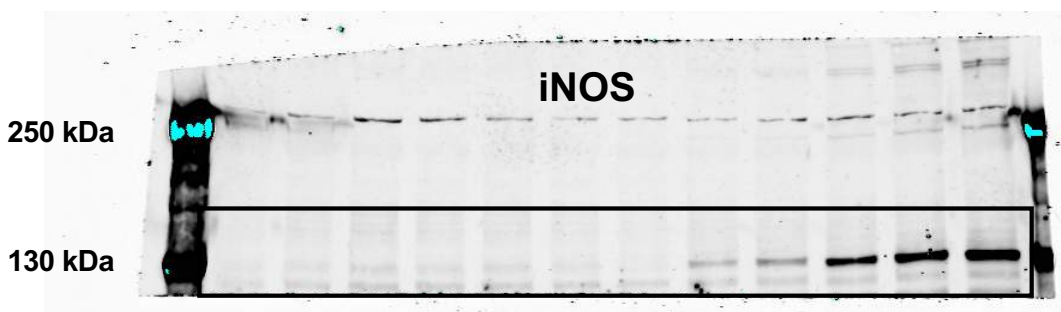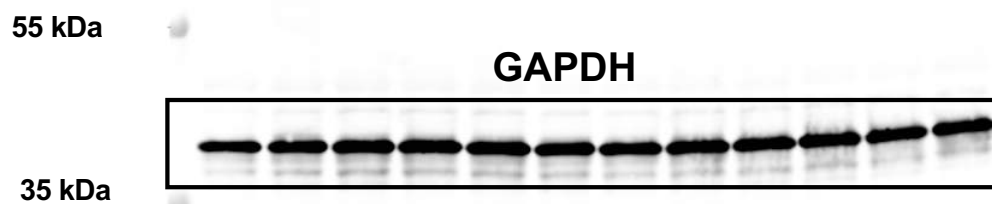



**Extended Data Figure 8e**

**iNOS**

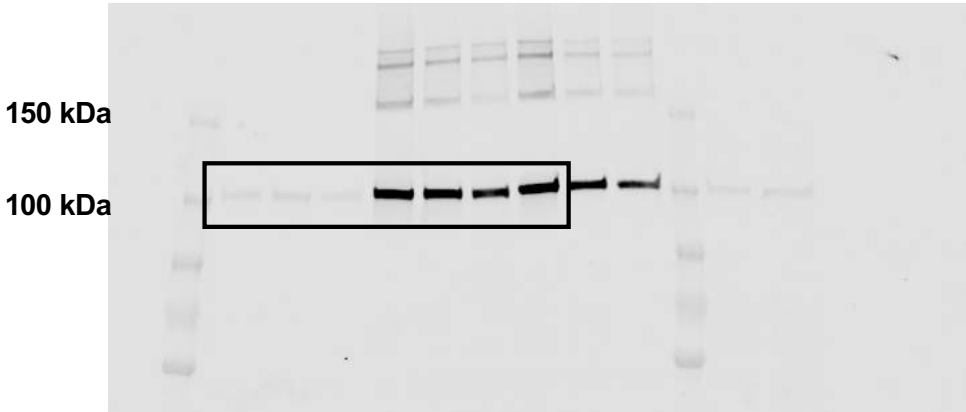

**Cys-SNO**

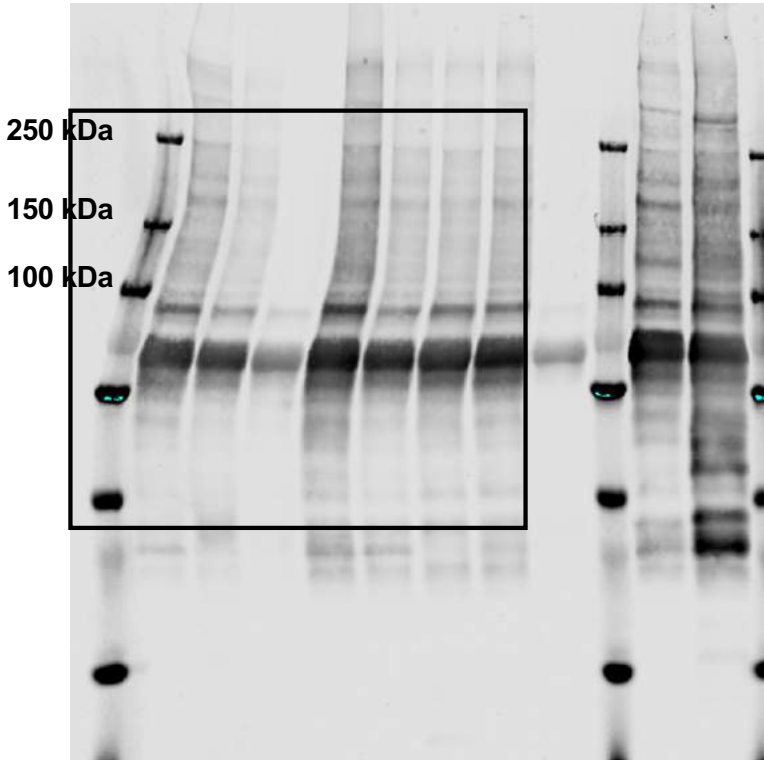

**GAPDH**

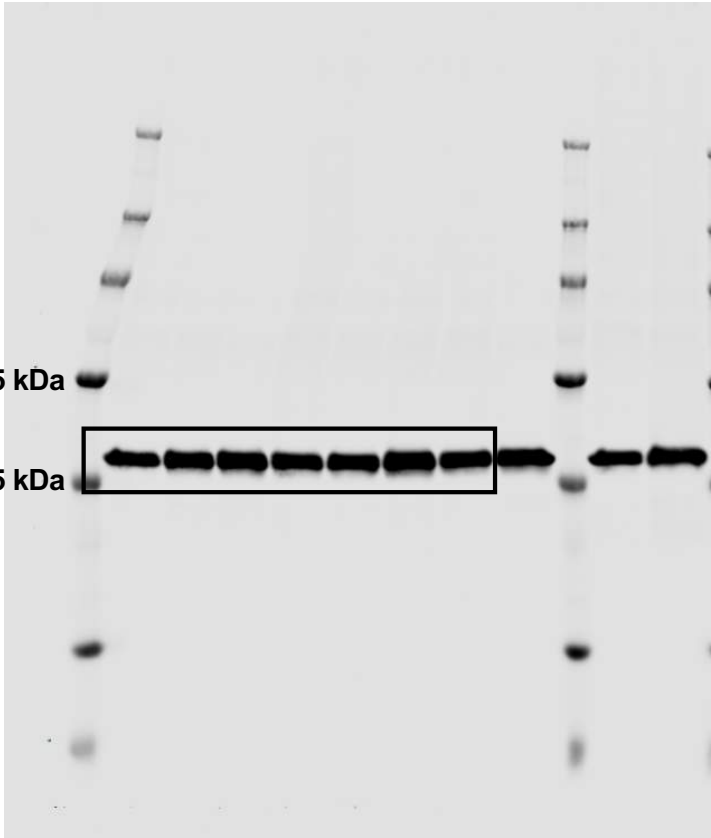

# Extended Data Figure 8f

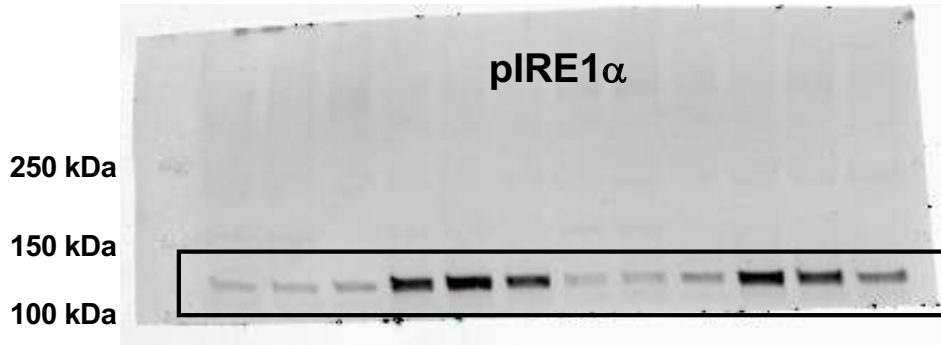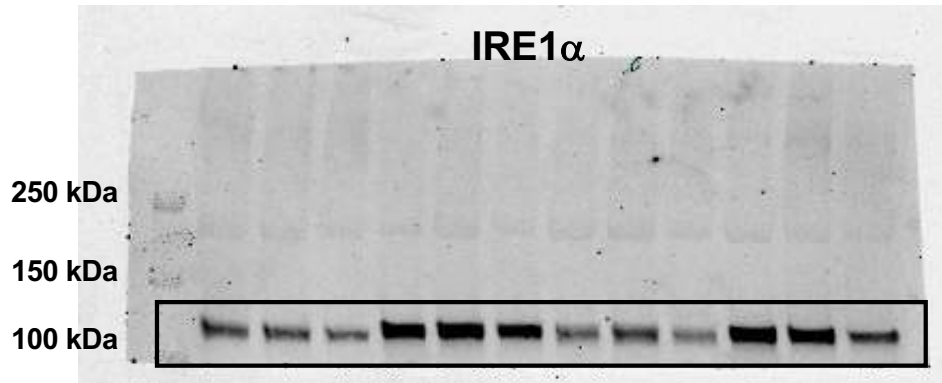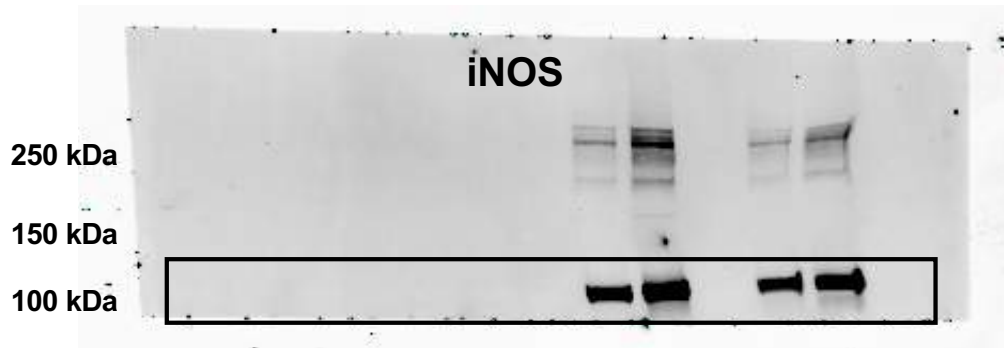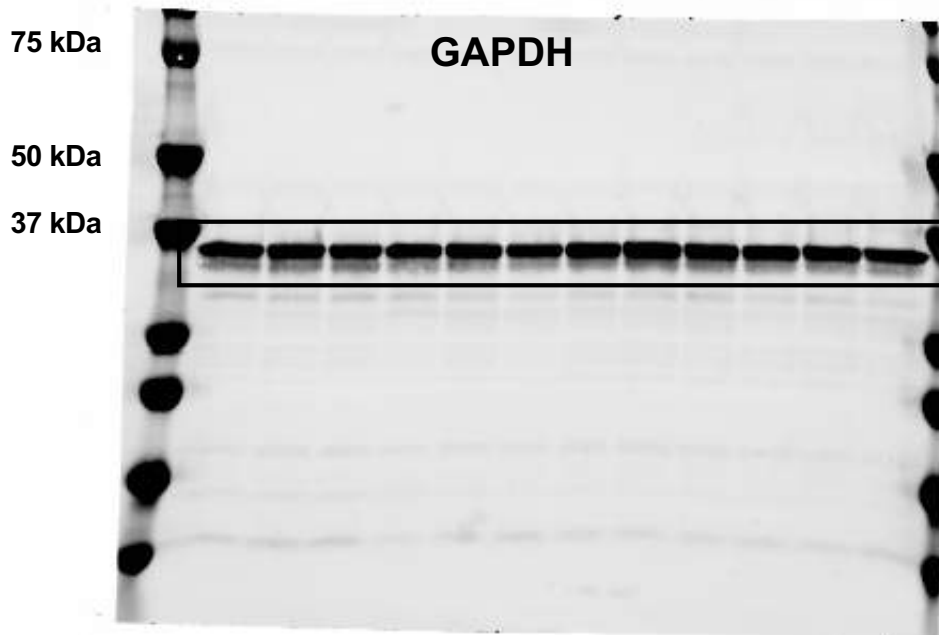

# Extended Data Figure 9a

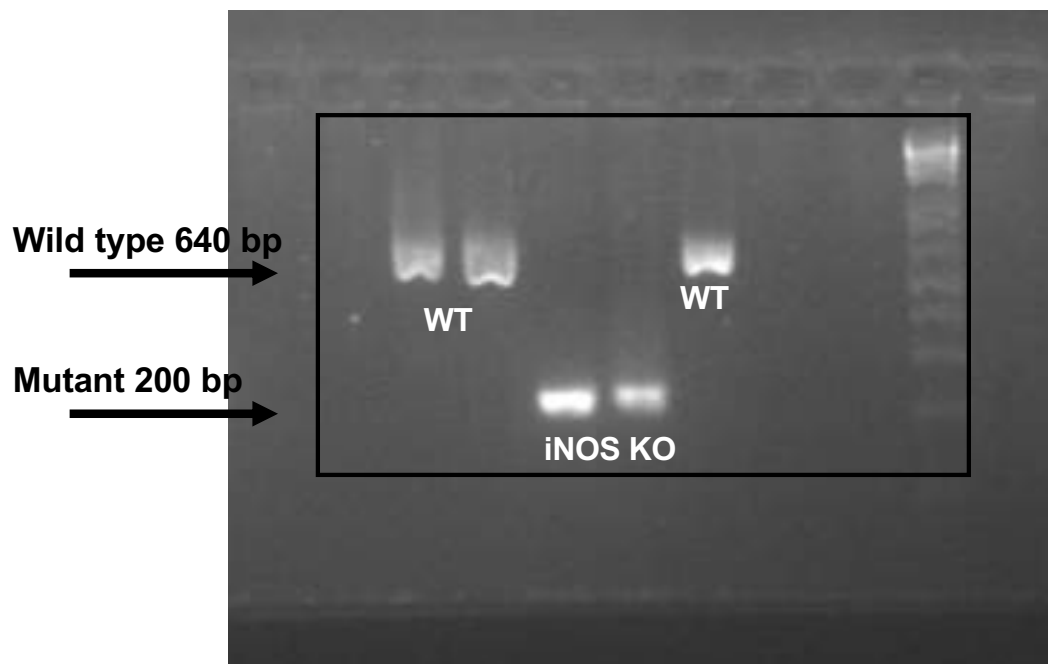

Supplement: NIHMS1030511-supplement-Supplemental_Figures.pdf [file NIHMS1030511-supplement-Supplemental_Figures.pdf]
